# Supplementary material for: Probing the activation sequence of NMDA receptors with lurcher mutations
Source: PubMed Central journal article supplement — J Gen Physiol. 2012 Sep;140(3):267–77. doi: 10.1085/jgp.201210786 (PMC3434102; doi:10.1085/jgp.201210786), 2012-09
Supplement: supp_jgp.201210786_JGP_201210786_sm.pdf [file supp_jgp.201210786_JGP_201210786_sm.pdf]

Murthy et al., <http://www.jgp.org/cgi/content/full/jgp.201210786/DC1>

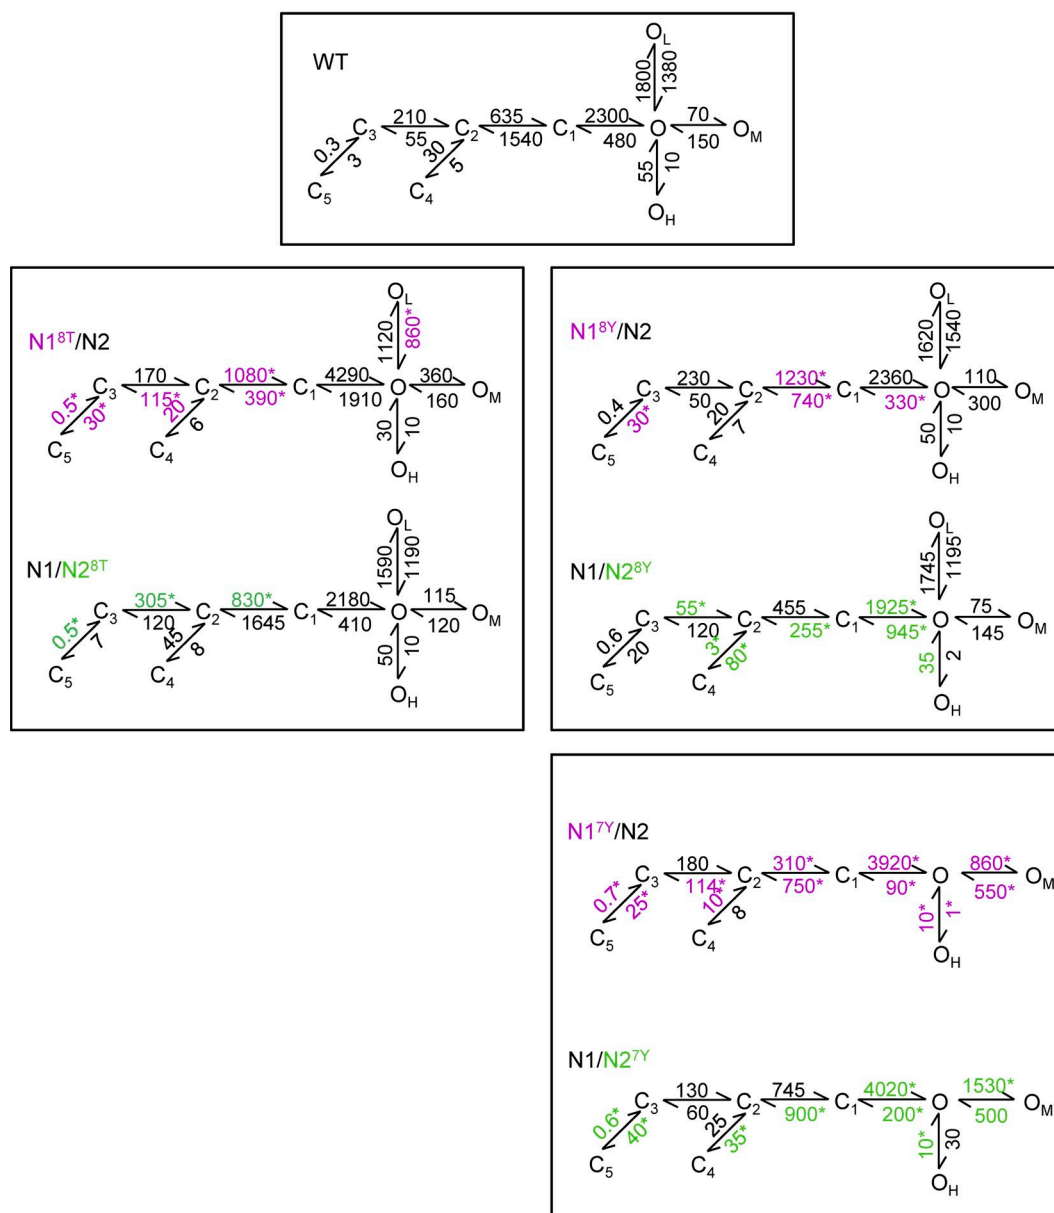

**Figure S1.** Reaction mechanism of NMDA receptors with *lurcher* and *lurcher*-like mutations obtained from fits with the indicated kinetic models. The connectivity of the open states is arbitrary; thus, the rate constants for these transitions have no mechanistic significance. Rate constants (s<sup>-1</sup>) represent rounded averages of values estimated for each transition from fits to individual files in a given dataset. \*, significant differences relative to WT ( $P < 0.05$ ) in a Student's *t* test.

*Table S1*  
*Closed kinetic components for lurcher and lurcher-like N1/N2A receptors*

|                      | $\tau_{E1}$             | $a_{E1}$<br>(%)     | $\tau_{E2}$             | $a_{E2}$<br>(%)     | $\tau_{E3}$          | $a_{E3}$<br>(%)      | $\tau_{E4}$            | $a_{E4}$<br>(%)         | $\tau_{E5}$              | $a_{E5}$<br>(%)        | $\tau_{E6}$   | $a_{E6}$<br>(%) |
|----------------------|-------------------------|---------------------|-------------------------|---------------------|----------------------|----------------------|------------------------|-------------------------|--------------------------|------------------------|---------------|-----------------|
|                      | <i>ms</i>               |                     | <i>ms</i>               |                     | <i>ms</i>            |                      | <i>ms</i>              |                         | <i>ms</i>                |                        | <i>ms</i>     |                 |
| N1/N2                | 0.2 ± 0.01              | 36 ± 2              | 2.3 ± 0.1               | 37 ± 2              | 6 ± 0.2              | 20 ± 2               | 35 ± 2                 | 1 ± 0.04                | 3,830 ± 270              | 0.16 ± 0.02            |               |                 |
| N1 <sup>8T</sup> /N2 | 0.4 ± 0.03 <sup>a</sup> | 62 ± 5 <sup>a</sup> | 1.1 ± 0.1 <sup>a</sup>  | 33 ± 5              | 6 ± 1                | 2 ± 0.4 <sup>a</sup> | 100 ± 30               | 0.3 ± 0.06 <sup>a</sup> | 3,269 ± 271              | 0.5 ± 0.1 <sup>a</sup> |               |                 |
| N1/N2 <sup>8T</sup>  | 0.2 ± 0.01              | 30 ± 2              | 1.7 ± 0.2               | 38 ± 2              | 5 ± 0.4 <sup>a</sup> | 29 ± 4               | 26 ± 3                 | 1 ± 0.3                 | 2,242 ± 83 <sup>a</sup>  | 0.33 ± 0.08            |               |                 |
| N1 <sup>8Y</sup> /N2 | 0.3 ± 0.02 <sup>a</sup> | 38 ± 6              | 1.2 ± 0.07 <sup>a</sup> | 52 ± 4 <sup>a</sup> | 4 ± 0.5 <sup>a</sup> | 3 ± 1 <sup>a</sup>   | 85 ± 32                | 0.2 ± 0.1 <sup>a</sup>  | 2,803 ± 305              | 0.23 ± 0.07            |               |                 |
| N1/N2 <sup>8Y</sup>  | 0.5 ± 0.02 <sup>a</sup> | 74 ± 3              | 2 ± 0.2                 | 19 ± 2 <sup>a</sup> | 23 ± 5               | 2 ± 1                | 673 ± 170 <sup>a</sup> | 2 ± 0.5                 | 4,583 ± 1139             | 1.3 ± 0.7              |               |                 |
| N1 <sup>7Y</sup> /N2 | 0.2 ± 0.01              | 70 ± 3 <sup>a</sup> | 2.3 ± 0.3               | 13 ± 1 <sup>a</sup> | 9 ± 0.9              | 13 ± 2               | 200 ± 48 <sup>a</sup>  | 1 ± 0.1                 | 1,693 ± 81 <sup>a</sup>  | 1.4 ± 0.3 <sup>a</sup> |               |                 |
| -/-                  | 0.3 ± 0.02 <sup>b</sup> | 38 ± 5 <sup>b</sup> | 2.9 ± 0.2               | 23 ± 2 <sup>b</sup> | 28 ± 6 <sup>b</sup>  | 10 ± 1               | 174 ± 42 <sup>b</sup>  | 4 ± 1 <sup>b</sup>      | 2,550 ± 227 <sup>b</sup> | 9 ± 2 <sup>b</sup>     | 9,010 ± 575   | 15 ± 4          |
| -/Gly                | 0.2 ± 0.02              | 41 ± 2              | 1.5 ± 0.1 <sup>a</sup>  | 40 ± 1              | 12 ± 3               | 9 ± 3                | 85 ± 16                | 4 ± 0.3 <sup>b</sup>    | 1,093 ± 80 <sup>b</sup>  | 4 ± 1 <sup>b</sup>     | 7,480 ± 2,440 | 1 ± 0.5         |
| N1/N2 <sup>7Y</sup>  | 0.2 ± 0.02              | 61 ± 6 <sup>a</sup> | 1.6 ± 0.2               | 31 ± 5              | 14 ± 3               | 4 ± 2 <sup>a</sup>   | 292 ± 86 <sup>a</sup>  | 1 ± 0.3                 | 2,645 ± 351              | 0.8 ± 0.3              |               |                 |

<sup>a</sup>Significantly different from WT (P < 0.05; Student's *t* test).

<sup>b</sup>Significant difference relative to N1<sup>7Y</sup>/N2 with Glu/Gly; P < 0.05 (Student's *t* test).

*Table S2*  
*Open kinetic components for lurcher and lurcher-like N1/N2A receptors*

|                      | $\tau_f$                | $a_f$<br>(%)           | $\tau_L$  | $a_L$<br>(%)        | $\tau_M$             | $a_M$<br>(%)         | $\tau_H$              | $a_H$<br>(%)         |
|----------------------|-------------------------|------------------------|-----------|---------------------|----------------------|----------------------|-----------------------|----------------------|
|                      | <i>ms</i>               |                        | <i>ms</i> |                     | <i>ms</i>            |                      | <i>ms</i>             |                      |
| N1/N2                | 0.3 ± 0.01              | 4 ± 0.3                | 4.4 ± 0.3 | 41 ± 5              | 11 ± 1               | 48 ± 4               | 20 ± 1                | 23 ± 9               |
| ( <i>n</i> )         | (5)                     |                        | (4)       |                     | (5)                  |                      | (3)                   |                      |
| N1 <sup>8T</sup> /N2 | 0.6 ± 0.1 <sup>a</sup>  | 5 ± 1                  | 5.2 ± 0.4 | 50 ± 10             | 15 ± 2               | 48 ± 7               | 47 ± 8                | 25 ± 8               |
| ( <i>n</i> )         | (11)                    |                        | (7)       |                     | (12)                 |                      | (8)                   |                      |
| N1/N2 <sup>8T</sup>  | 0.4 ± 0.03              | 4 ± 1                  | 5.0 ± 0.8 | 30 ± 6              | 12 ± 1               | 54 ± 6               | 24 ± 1                | 19 ± 6               |
| ( <i>n</i> )         | (7)                     |                        | (5)       |                     | (7)                  |                      | (5)                   |                      |
| N1 <sup>8Y</sup> /N2 | 0.3 ± 0.02              | 3 ± 0.2                | 4 ± 0.5   | 31 ± 10             | 9 ± 0.9              | 60 ± 9               | 23 ± 2                | 9 ± 6                |
| ( <i>n</i> )         | (3)                     |                        | (6)       |                     | (6)                  |                      | (5)                   |                      |
| N1/N2 <sup>8Y</sup>  | 0.3 ± 0.01              | 8 ± 1 <sup>a</sup>     | 4 ± 0.2   | 70 ± 7 <sup>a</sup> | 8 ± 0.5 <sup>a</sup> | 25 ± 6 <sup>a</sup>  | 31 ± 6                | 1 ± 0.04             |
| ( <i>n</i> )         | (7)                     |                        | (7)       |                     | (6)                  |                      | (3)                   |                      |
| N1 <sup>7Y</sup> /N2 | 0.6 ± 0.05 <sup>a</sup> | 1.4 ± 0.4 <sup>a</sup> | ND        | ND                  | 60 ± 8 <sup>a</sup>  | 83 ± 8 <sup>a</sup>  | 111 ± 11 <sup>a</sup> | 13 ± 8               |
| ( <i>n</i> )         | (5)                     |                        |           |                     | (5)                  |                      | (5)                   |                      |
| -/-                  | 0.6 ± 0.06              | 3 ± 1                  | ND        | ND                  | 50 ± 3               | 36 ± 17 <sup>b</sup> | 89 ± 8                | 75 ± 13 <sup>b</sup> |
| ( <i>n</i> )         | (5)                     |                        |           |                     | (4)                  |                      | (5)                   |                      |
| -/Gly                | 0.8 ± 0.1               | 1 ± 0.1                | ND        | ND                  | 22 ± 4               | 55 ± 21              | 45 ± 11               | 63 ± 17              |
| ( <i>n</i> )         | (3)                     |                        |           |                     | (3)                  |                      | (5)                   |                      |
| N1/N2 <sup>7Y</sup>  | 0.5 ± 0.03 <sup>a</sup> | 4 ± 0.5                | ND        | ND                  | 62 ± 8 <sup>a</sup>  | 41 ± 7               | 150 ± 20 <sup>a</sup> | 54 ± 7               |
| ( <i>n</i> )         | (5)                     |                        |           |                     | (5)                  |                      | (5)                   |                      |

ND, not detected.

<sup>a</sup>Statistically different from WT (P < 0.05) in a Student's *t* test.

<sup>b</sup>Significant difference relative to N1<sup>7Y</sup>/N2 with Glu/Gly; P < 0.05 (Student's *t* test).
